# Supplementary material for: Refining the airborne wind energy systems power equations with a vortex wake model
Source: Copernicus journal article supplement (doi:10.5194/wes-2023-52), 2023-05-15
Supplement: Supplementary file [file wes-2023-52-AC1-supplement.pdf]

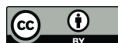

# Refining the airborne wind energy systems power equations with a vortex wake model

Filippo Trevisi<sup>1</sup>, Carlo E.D. Riboldi<sup>1</sup>, and Alessandro Croce<sup>1</sup>

<sup>1</sup>Department of Aerospace Science and Technology, Politecnico di Milano, Via La Masa 34, 20156 Milano, Italy

**Correspondence:** F. Trevisi (filippo.trevisi@polimi.it)

**Abstract.** The power equations of crosswind Ground-Gen and Fly-Gen airborne wind energy systems (AWESs) flying circular trajectories are refined to include the contribution from the aerodynamic wake, modelled with vortex methods. This allows to understand the effect of changing turning radius, wing geometry and aerodynamic coefficients on the aerodynamic power production. A novel power coefficient is defined by normalizing the aerodynamic power with the wind power passing through a disc with radius equal to the AWES wing span. The aspect ratio which maximizes this power coefficient (i.e. which maximizes the aerodynamic power for a given wing span) is finite and its analytical expression for an infinite turning radius is derived. By considering the optimal wing aspect ratio, the maximum power coefficient is found and its analytical expression for an infinite turning radius is derived. Ground-Gen and Fly-Gen AWESs, with the same geometry, are compared in terms of power production and three AWESs from literature are analyzed. Ground-Gen have lower power potential than the same geometry Fly-Gen AWESs because the reel-out velocity makes them to fly closer to their own wake.

## 1 Introduction

Airborne Wind Energy (AWE) is the field of wind energy in which airborne systems, connected to the ground through a tether, harvest high altitude wind power. Airborne Wind Energy Systems (AWESs) can be classified, based on their flight operations, in crosswind, rotational and tether aligned (Vermillion et al. (2021)). The mechanical power can be converted to electrical on the ground with a moving or fixed ground station (Ground-Gen) or with onboard wind turbines and transmitted to the ground through the tether (Fly-Gen). This work concerns Fly-Gen and Ground-Gen crosswind AWESs featuring a single wing.

The first theoretical power equation of crosswind AWESs is derived by Loyd (1980), for given lift and drag coefficients of the system. Other works (e.g. Diehl (2013); Schmehl et al. (2013); Luchsinger (2013); Argatov and Silvennoinen (2013)) follow Loyd's effort and refine the power equation, still based on given system aerodynamic coefficients. To use these models, the lift and drag coefficients need then to be known and modelled. In particular, the lift coefficient is typically modelled as function of the wing angle of attack, the wing geometry and the airfoils characteristics. A desired feasible (i.e. before stall) lift coefficient can be obtained by pitching the wing to obtain the correspondent angle of attack. The system drag coefficient include contributions from the viscous and pressure drag, the tether drag (Trevisi et al. (2020a)) and the induced drag. The latter is the result of the velocities induced by the AWES wake on the AWES itself. The induced velocities reduce the relative wind velocity intensity and effectively rotate the relative velocity, composed by the undisturbed relative wind velocity and the



AWES velocity, of an induced angle. Since the aerodynamic lift is defined to be perpendicular to the local relative velocity, it is rotated by the induced angle. The component of lift parallel to the undisturbed relative velocity is then the induced drag. In AWE, the induced velocities and the induced drag are typically estimated using Prandtl lifting-line theory, developed for wings in forward flight (i.e. the aerodynamic wake is straight). For example, Vander Lind (2013); Bauer et al. (2018) and Trevisi et al. (2020b) refine Loyd power equation by finding the induced drag coefficient with the straight wake assumption. To overcome the straight wake assumption in engineering models, the induced velocities are modelled with momentum methods (De Lellis et al. (2018); Kheiri et al. (2018, 2019)) and vortex methods (Leuthold et al. (2019); Gaunaa et al. (2020); Trevisi et al. (2023)).

Gaunaa et al. (2020) point out that using momentum methods to analyze the induction for an AWES, which is described by 3D polars, is not physically consistent. Indeed, momentum theory is used in rotor aerodynamics to find the velocity triangle of an airfoil (2D polars) along the blade. If then momentum theory is used to evaluate the induction at an airfoil in the AWES wing (2D polars), a root and a tip correction would be needed to take into account that the rotor is not a disc, but a single wing. However, the corrections for AWESs would differ largely from wind turbines corrections, as these are developed for blades extending almost to the rotation axis, and need a dedicated study. Gaunaa et al. (2020) then introduce a vortex-based engineering model to find the induced velocities at the AWES. Based on these considerations, Trevisi et al. (2023) find an induced drag coefficient of the AWES with vortex methods. The helicoidal wake structure is modelled with an expression for the near wake (first half rotation of the wake) and one for the far wake (from the second half of the wake to infinity). The induced drag related to the near wake is found to be similar to the induced drag the same wing would have in forward flight (i.e. with straight wakes). The induced drag coefficient related to the far wake is modelled as function of the near wake drag coefficient, the ratio between the wing span and the turning radius and the helicoidal wake pitch. The latter can be found iteratively as function of the other geometrical and aerodynamic quantities. The model is validated with the the lifting line free vortex wake method (Marten et al. (2015)) implemented in QBlade.

In this work, a power equation refinement, based on the aerodynamic modelling from Trevisi et al. (2023), is introduced. Properly including the aerodynamic wake into the power equation allows to understand the effect of changing turning radius, wing aspect ratio and aerodynamic coefficients on the overall performance. This is particularly relevant when studying the performance of a given system or carrying out a system design.

This paper is organized as follows: In Sect. 2, the main assumptions and equations of the vortex model from Trevisi et al. (2023) are recalled, to make this manuscript self-contained. In Sect. 3 and 4, the power equations of Ground-Gen and Fly-Gen AWESs are derived. In Sect. 5, Ground-Gen and Fly-Gen AWESs, with the same geometry, are compared in terms of power production. In Sect. 6, three AWES designs from literature are analyzed. In Sect. 7, the main conclusions are discussed.

## 2 Vortex wake model

In this section, the main assumptions and final equations of the vortex model introduced by Trevisi et al. (2023) are summarized. This model is employed to refine the Ground-Gen and Fly-Gen AWES power equations in the next sections.

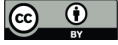

Referring to Fig. 1, the AWES moves on a circular trajectory with radius  $R_0$  in the plane  $(e_1, e_2)$ , which is perpendicular to the incoming wind  $v_w = -v_w e_3$ . In this model, the wind is assumed constant and the gravity is neglected. The AWES has a constant speed and its wing, assumed to be elliptical, is on the rotational plane. Trevisi et al. (2022a) show that these are the optimal trajectories for a Fly-Gen maximising thrust power with constant inflow and the AWES flight mechanics can be studied about this condition (Trevisi et al. (2021)). For Ground-Gen AWESs, the reel-out velocity of the tether is  $v_o = -v_o e_3$ , assumed to be only along the axial direction, such that the relative wind velocity is  $v_r = v_w - v_o$ . For Fly-Gen AWESs, the tether is fixed and the relative wind velocity coincides with the wind velocity  $v_r = v_w$ .

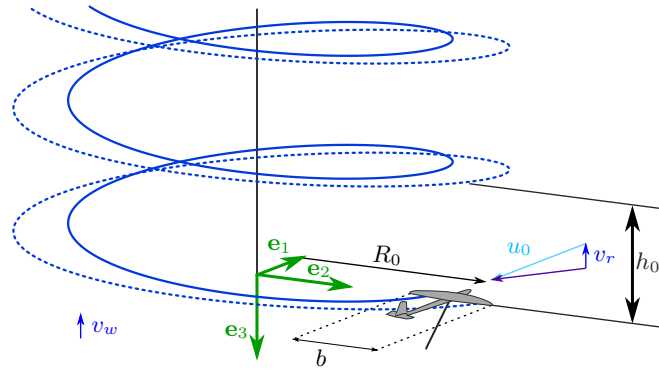

**Figure 1.** Wake structure of an AWES flying circular trajectories. The solid and dashed blue lines represent the left and right rolled up vortices respectively.

The wake, assumed to be non expanding, is transported downwind by the wind and has a helicoidal shape. The wake model is divided into an expression for the near wake, which is defined as the first half rotation of the wake, and one for the far wake, which is from the second half rotation to infinity.

The induced drag coefficient due to the near wake is similar to the induced drag coefficient the same wing would have in forward flight

$$C_D^n \approx \frac{C_L^2}{\pi \mathcal{A}}, \quad (1)$$

where  $C_L$  and  $\mathcal{A}$  are the wing lift coefficient and the aspect ratio, respectively.

The induced drag coefficient due to the far wake is

$$C_D^f \approx \frac{1}{4\pi} \frac{C_L^2}{\pi \mathcal{A}} \kappa_0^{\pi/2} \lambda_0^{3/2}, \quad (2)$$

where  $\kappa_0$  is the inverse turning ratio, defined as the ratio between the half-span  $b/2$  and the turning radius

$$\kappa_0 = \frac{b}{2R_0}, \quad (3)$$

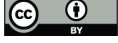

and  $\lambda_0$  is the normalized torsional parameter of the helicoidal wake, which physically represents the ratio between the circumference length, which is known, and the helix pitch  $h_0$ , which is unknown,

$$\lambda_0 = \frac{2\pi R_0}{h_0}. \quad (4)$$

Considering the drag coefficient related to the near and far wake, the system glide ratio is

$$G = \frac{C_L}{C_D + C_{T,t}} = \frac{C_L}{C_{D0} + \frac{C_L^2}{\pi \mathcal{R}} + \frac{1}{4\pi} \frac{C_L^2}{\pi \mathcal{R}} \kappa_0^{\pi/2} \lambda_0^{3/2} + C_{T,t}}, \quad (5)$$

where  $C_D$  is the system aerodynamic drag,  $C_{D0}$  is the system drag coefficient at zero lift and  $C_{T,t}$  is a coefficient modelling the thrust of the onboard wind turbines, in case of Fly-Gen AWESs. More details on  $C_{T,t}$  are given in Sect. 4.  $C_{D0}$  is the summation of the aircraft viscous and pressure drag  $C_{D,v}$  and the equivalent tether drag  $C_{D,t} = C_{D\perp} \frac{D_t L_t}{4A}$ , where  $C_{D\perp}$  is the drag coefficient of the tether section,  $D_t$  the tether diameter,  $L_t$  the tether length and  $A$  the main wing area (Trevisi et al. 2020a).

The wing speed ratio  $\lambda$  is defined as the ratio between the AWES tangential velocity  $u_0$  and the relative wind speed  $v_r$ . For the AWES to have a constant speed, the wing speed ratio  $\lambda = \frac{u_0}{v_r}$  needs to be equal to the glide ratio  $G$  (see Fig. 2 for Ground-Gen and Fig. 4 for Fly-Gen AWESs)

$$\lambda = G. \quad (6)$$

The normalized torsional parameter  $\lambda_0$ , necessary for the evaluation of the far wake induced drag  $C_D^f$  (Eq. 2), can be found with

$$\lambda_0 = \frac{\lambda}{\sqrt{(1 - a_z)^2 + a_r^2}}, \quad (7)$$

where  $a_z$  is the axial induction

$$a_z = \lambda \frac{C_L}{\pi \mathcal{R}} \left( 1 + \frac{1}{4\pi} \kappa_0^{\pi/2} \lambda_0^{3/2} \right), \quad (8)$$

and  $a_r$  the radial induction

$$a_r = \lambda \frac{2}{9\pi} \frac{C_L}{\pi \mathcal{R}} \kappa_0^{\pi/2} \lambda_0^{1.1}. \quad (9)$$

The normalized torsional parameter  $\lambda_0$  can be found numerically by setting the residual  $h$  of Eq. (7) to zero

$$h(\lambda_0, C_{D0}, C_{T,t}, C_L, \mathcal{R}, \kappa_0) = \lambda_0 - \frac{\lambda}{\sqrt{(1 - a_z)^2 + a_r^2}} = 0, \quad (10)$$

where  $a_z$  and  $a_r$  are given in Eqs. (8) and (9), the wing speed ratio  $\lambda$  is equal to the glide ratio  $G$ , which is given in Eq. (5).

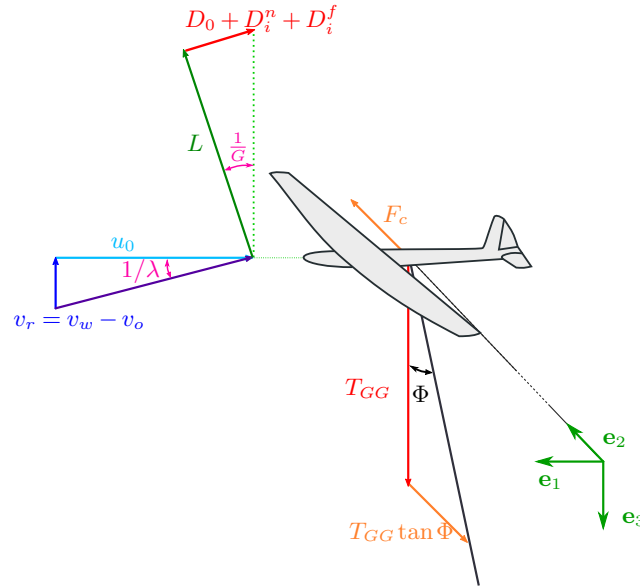

**Figure 2.** Velocity triangle and forces acting on a Ground-Gen AWES in crosswind steady state.

### 100 3 Reel-out power equation of Ground-Gen AWESs

In this section, the power equation of Ground-Gen AWESs, considering the helicoidal wake modelling given in Sect. 2, is derived.

Referring to Fig. 2, the relative wind velocity  $v_r$  is the difference between the incoming wind velocity and the axial component of the reel-out velocity  $v_r = v_w - v_o$ . In accordance with the vortex wake model of Sect. 2, the incoming wind is assumed constant and the gravity is neglected, which makes the problem axial-symmetric. In steady state, the forces acting on the AWES need to be in equilibrium. For the force balance along  $e_1$  to be null, the wing speed ratio  $\lambda = u_0/v_r$  needs to be equal to the glide ratio  $G$ . For the force balance along  $e_3$  to be null, the axial component of the tensile force acting on the tether  $T_{GG}$  needs to be equal to the total aerodynamic force and can be approximated, for high glide ratios, with the lift force generated by the AWES flying at the velocity  $u_0 = G v_r$ .

$$110 \quad T_{GG} \approx \frac{1}{2} \rho A C_L G^2 v_w^2 (1 - \gamma_o)^2, \quad (11)$$

where  $\rho$  is the air density,  $A$  is the wing area and  $\gamma_o = \frac{v_o}{v_w}$  is the reel-out factor (measuring how much the tether is reeled out along the axial direction with respect to the wind speed). For the force balance along  $e_2$  to be null, the centrifugal force  $F_c = m \frac{u_0^2}{R_0}$ , where  $m$  is the AWES mass plus one third of the tether mass (Trevisi et al. (2020a)), needs to be equal to the radial component of the tether force  $T_{GG} \tan \Phi$ . This condition is obtained by choosing the opening angle  $\Phi$  which satisfies (Trevisi et al. (2020a))

$$115 \quad \sin \Phi \tan \Phi = M = \frac{m}{\frac{1}{2} \rho C_L A L_t}. \quad (12)$$

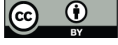

The reel-out power is then the product between the axial component of the tether force  $T_{GG}$  and the axial component of the reel-out velocity  $v_o = v_w \gamma_o$

$$P_{GG} = \frac{1}{2} \rho A C_L G^2 v_w^3 \gamma_o (1 - \gamma_o)^2. \quad (13)$$

120 Taking inspiration from conventional wind energy, a power coefficient can be obtained by normalizing the power  $P_{GG}$  with a reference kinetic energy per unit time, i.e. the power of the flow passing through a reference area  $A_{ref}$ . In the case of conventional wind turbines, this reference kinetic energy rate is commonly defined by the far field flow velocity value and the rotor disc area. In AWE, one could take as a reference area the annulus swept by the AWES  $A_{ref} = 2\pi R_0 b$  (blue area in Fig. 3). However, this area varies at different wind speeds as the turning radius  $R_0$  depends on the AWES lift coefficient  $C_L$  through

125 Eq. (12) (note that  $R_0 = L_t \sin \Phi$ ). A second option would be to take as reference area the AWES wing area  $A_{ref} = A$ . This would lead to the power harvesting factor  $PHF$ , as defined by Diehl (2013) and Kheiri et al. (2019). The power harvesting factor allows to compare AWESs for a given wing area. A third option, used in this work, is to take  $A_{ref}$  as the area of a disc with radius equal to the AWES wing span  $A_{ref} = \pi b^2$  (orange area in Fig. 3). With this definition,  $A_{ref}$  is a fixed value defined by the geometry of the system, as for conventional wind turbines, and allows to compare AWESs for a given wing span.

130 Moreover,  $A_{ref}$  is the reference area of an equivalent conventional turbine characterized by the same lifting body span (i.e. the wind turbine blades and the AWES wing have the same span). The advantage of this power coefficient definition compared to the first two will be evident when analyzing the results in Sect. 5. Adopting the latter reference area definition and writing the wing area as  $A = \frac{b^2}{\mathcal{R}}$ , the power coefficient is

$$C_{P,GG} = \frac{P_{GG}}{\frac{1}{2} \rho v_w^3 A_{ref}} = \gamma_o (1 - \gamma_o)^2 \frac{C_L}{\pi \mathcal{R}} \left( \frac{C_L}{C_D} \right)^2. \quad (14)$$

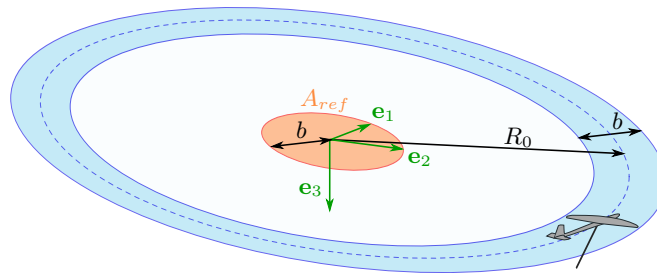

**Figure 3.** Reference area for the power coefficient evaluation.

135 With the same approach, a thrust coefficient can be defined as

$$C_{T,GG} = \frac{T_{GG}}{\frac{1}{2} \rho v_w^2 A_{ref}} = (1 - \gamma_o)^2 \frac{C_L}{\pi \mathcal{R}} \left( \frac{C_L}{C_D} \right)^2. \quad (15)$$

The ratio between the power and the thrust coefficient is then

$$\frac{C_{P,GG}}{C_{T,GG}} = \gamma_o. \quad (16)$$

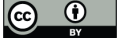

Since the system drag coefficient is not influenced by the relative wind speed at the AWES,  $C_{P,GG}$  is maximized when the  
 140 term  $\gamma_o(1 - \gamma_o)^2$  is maximized, which is for  $\gamma_o = 1/3$ . The maximum power coefficient is then

$$C_{P,GG}^* = \frac{4}{27} \frac{C_L}{\pi AR} \left( \frac{C_L}{C_D} \right)^2. \quad (17)$$

Note that this power coefficient does not model the reel-in phase and the power losses due to the potential energy exchange.

#### 4 Shaft power equation of Fly-Gen AWES

In this section, the power equation of Fly-Gen AWESs, considering the wake model given in Sect. 2, is derived.

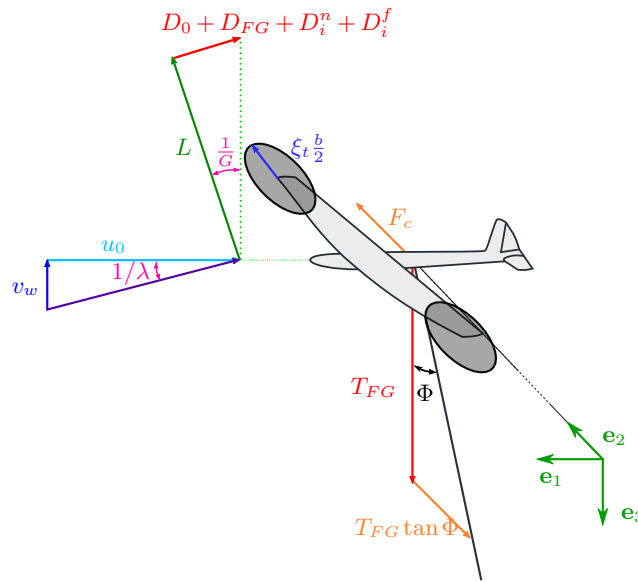

**Figure 4.** Velocity triangle and forces acting on a Fly-Gen AWES in crosswind steady state.

145 For a Fly-Gen, as no reel-out velocity is present, the relative wind speed is the actual wind speed  $v_r = v_w$ . The incoming  
 wind is assumed constant and gravity is neglected in this work, such that the problem is axial-symmetric. In steady state, the  
 forces acting on the AWES need to be in equilibrium. For the force balance along  $e_1$  to be null, the wing speed ratio  $\lambda = u_0/v_w$   
 needs to be equal to the glide ratio  $G$ . For the force balance along  $e_3$  to be null, the axial component of the tensile force acting  
 150 on the tether  $T_{FG}$  needs to be equal to the total aerodynamic force and can be approximated, for high glide ratios, with the lift

$$T_{FG} \approx \frac{1}{2} \rho A C_L G^2 v_w^2. \quad (18)$$

For the force balance along  $e_2$  to be null, Eq. (12) needs to be satisfied, as for Ground-Gen AWESs.

The thrust force produced by the onboard wind turbines is

$$D_{FG} = \frac{1}{2} \rho A C_{T,t} G^2 v_w^2, \quad (19)$$



155 where  $C_{T,t}$  is the thrust coefficient of the onboard wind turbines with respect to the wing area (and not to the onboard wind turbines rotor area, as typically done for conventional wind energy). As  $D_{FG}$  is felt by the AWES dynamics as a drag force,  $C_{T,t}$  should be included into the system glide ratio estimation, as in Eq. (5).  $C_{T,t}$  can be expressed as function of the aerodynamic drag as  $C_{T,t} = \gamma_t C_D$ , where  $C_D$  is the system drag. The system glide ratio is then

$$G = \frac{1}{\left(\frac{C_{D0}}{C_L} + \frac{C_L}{\pi \bar{R}} + \frac{1}{4\pi} \frac{C_L}{\pi \bar{R}} \kappa_0^{\pi/2} \lambda_0^{3/2}\right) (1 + \gamma_t)}. \quad (20)$$

160 The thrust power of the onboard wind turbines  $P_{t,FG}$  is the product between the thrust force  $D_{FG}$  and the Fly-Gen AWES velocity  $u_0 = Gv_w$

$$P_{t,FG} = \frac{1}{2} \rho A \gamma_t C_D G^3 v_w^3. \quad (21)$$

The shaft power of the onboard wind turbines (i.e., the mechanical power that can be converted to electrical power)  $P_{FG}$  is modeled using 1D momentum theory (actuator disc) as

165 
$$P_{FG} = (1 - a_t) P_{t,FG} \approx \left(1 - \frac{\gamma_t C_D}{4} \frac{A}{A_t}\right) P_{t,FG}, \quad (22)$$

where the onboard wind turbines induction  $a_t$ , assumed small, is found by setting Eq. (19) equal to the thrust given by momentum theory  $D_{FG} = \frac{1}{2} \rho A_t (4a_t(1 - a_t)) G^2 v_w^2 \approx \frac{1}{2} \rho A_t (4a_t) G^2 v_w^2$  (Trevisi et al. (2020b)) and  $A_t$  is the total turbines area. A small value of  $a_t \approx \frac{\gamma_t C_D}{4} \frac{A}{A_t}$  is necessary to reduce power losses due to the onboard wind turbines induction and to the potential energy exchange (Trevisi et al. (2022a)). The turbines radius can be expressed as a function of the wing span as  $R_t = \xi_t \frac{b}{2}$  (Fig. 170 4). The total rotor area of the turbines is  $A_t = n_t \frac{\pi}{4} \xi_t^2 b^2$ , where  $n_t$  is the number of turbines, assumed to be all of the same size. To present results in a more concise way, without losing generality, the number of turbines is assumed to be equal to two  $n_t = 2$ , such that  $\xi_t \in [0, 1]^1$ . The shaft power can be written as

$$P_{FG} = \frac{1}{2} \rho A \gamma_t C_D G^3 v_w^3 \left(1 - \frac{\gamma_t C_D}{2\pi \bar{R} \xi_t^2}\right). \quad (23)$$

175 The thrust power coefficient of Fly-Gen AWES, taking the reference area as the disc with radius equal to the AWES wing span, is

$$C_{P_{t,FG}} = \frac{P_{t,FG}}{\frac{1}{2} \rho v_w^3 A_{ref}} = \frac{\gamma_t}{(1 + \gamma_t)^3} \frac{C_L}{\pi \bar{R}} \left(\frac{C_L}{C_D}\right)^2, \quad (24)$$

where  $C_D$  depends on  $\gamma_t$  through the normalized torsional parameter  $\lambda_0$ . In the case of straight wakes ( $\kappa_0 = 0$ ) the optimal value of  $\gamma_t$  which maximize the thrust power  $P_{t,FG}$  is  $\gamma_t = 1/2$  (Loyd (1980)). Using this value, the thrust power coefficient is

180 
$$C_{P_{t,FG}} \left(\gamma_t = \frac{1}{2}\right) = \frac{4}{27} \frac{C_L}{\pi \bar{R}} \left(\frac{C_L}{C_D}\right)^2, \quad (25)$$

<sup>1</sup>The limiting case with  $\xi_t = 1$  can be obtained with the two turbines placed at the wing tips. This corresponds to the largest value of  $A_t$  possible, considering  $n_t \geq 2$ .





which coincides with the maximum power coefficient of Ground-Gen AWESs when  $\kappa_0 = 0$ :  $C_{P_t,FG}(\gamma_t = 1/2, \kappa_0 = 0) = C_{P_t,CG}^*(\kappa_0 = 0)$  (Eq. 17). For  $\kappa_0$  larger than zero, the far wake contributes in different ways for the two generation types, leading to different power coefficient. This is shown in Sect. 5.

The shaft power coefficient includes power losses due to the onboard wind turbines induction

$$185 \quad C_{P,FG} = \frac{P_{FG}}{\frac{1}{2}\rho v_w^3 A_{ref}} = \frac{\gamma_t}{(1 + \gamma_t)^3} \frac{C_L}{\pi \mathcal{R}} \left( \frac{C_L}{C_D} \right)^2 \left( 1 - \frac{\gamma_t C_D}{2\pi \mathcal{R} \xi_t^2} \right). \quad (26)$$

Note that this power coefficient does not model power losses due to the potential energy exchange. See Trevisi et al. (2022a) for more details on these losses.

With the same approach, the thrust coefficient can be defined as

$$C_{T,FG} = \frac{T_{FG}}{\frac{1}{2}\rho v_w^2 A_{ref}} = \frac{1}{(1 + \gamma_t)^2} \frac{C_L}{\pi \mathcal{R}} \left( \frac{C_L}{C_D} \right)^2, \quad (27)$$

190 and ratio between power and thrust coefficient is

$$\frac{C_{P,FG}}{C_{T,FG}} = \frac{\gamma_t}{1 + \gamma_t} \left( 1 - \frac{\gamma_t C_D}{2\pi \mathcal{R} \xi_t^2} \right). \quad (28)$$

## 5 Comparison between Ground-Gen and Fly-Gen AWESs

In this section, Ground-Gen and Fly-Gen AWES performances are compared according to the mathematical models introduced in the previous sections.

195 First, a parametric study for Fly-Gen on the parameter  $\xi_t$ , which indicates the size of the onboard wind turbines (Fig. 4), is carried out. A case with  $\mathcal{R} = 20$ ,  $\kappa_0 = 0.15$ ,  $C_{D0} = 0.05$  is considered in this section, corresponding to the example in Trevisi et al. (2023). Figure 5 shows the optimal values of  $\gamma_t$  on the left axis and the efficiency due to the onboard wind turbine induction  $1 - a_t$  on the right axis, as function of the lift coefficient, for three different  $\xi_t$ . The optimal values of  $\gamma_t$  are found by solving the optimization problem

$$200 \quad (\gamma_t, \lambda_0)^* = \arg \left( \max_{(\gamma_t, \lambda_0)} C_{P,FG}(\gamma_t, \lambda_0, C_L, C_{D0}, \mathcal{R}, \kappa_0, \xi_t) \right), \quad (29)$$

subject to:  $h(\gamma_t, \lambda_0, C_L, C_{D0}, \mathcal{R}, \kappa_0) = 0$ ,

where  $h$  is defined in Eq. (10). As expected, smaller onboard turbines decrease the efficiency  $1 - a_t$ . For the following analyses in this section, it is assumed  $\xi_t = 0.15$  when the case with  $\mathcal{R} = 20$ ,  $\kappa_0 = 0.15$ ,  $C_{D0} = 0.05$  is considered, as this is considered a reasonable value. For low lift coefficients, the optimal value of  $\gamma_t$  is close to 0.5. As soon as the effect of the far wake starts to contribute to the overall drag, it rises above 0.5 to decrease the glide ratio  $G$  (Eq. 20) and consequently the normalized torsional parameter  $\lambda_0$ . Decreasing  $\lambda_0$  increases the vortex rings axial distance  $h_0$  (Eq. 4) and thus decreases the induction due to the far wake.

205

Figure 6 shows the normalized torsional parameters and the glide ratios of Ground-Gen and Fly-Gen AWESs (blue and red line respectively). Ground-Gen values are found by considering  $\gamma_0 = 1/3$  and solving numerically Eq. (10). Fly-Gen values

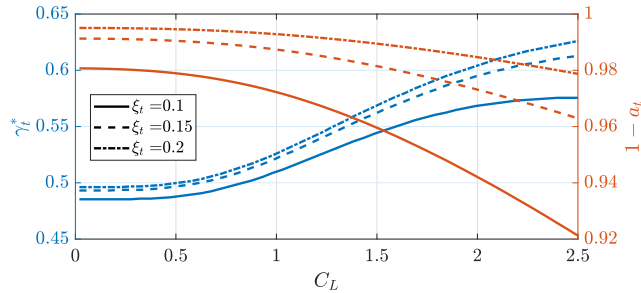

**Figure 5.** Optimal value of  $\gamma_t^*$  (blue - left axis) and efficiency due to onboard wind turbine induction (red - right axis) for different onboard wind turbine adimensional radius  $\xi_t$  as function of the AWES lift coefficient. Case with  $\mathcal{R} = 20$ ,  $\kappa_0 = 0.15$ ,  $C_{D0} = 0.05$ .

are found by solving the optimization problem (29). As the onboard wind turbines thrust is acting as a drag force on Fly-Gen  
 210 AWESs, they have lower system glide ratio compared to Ground-Gen. The normalized torsional parameter  $\lambda_0$  is linked to the  
 wind speed ratio  $\lambda$ , which is equal to the glide ratio  $\lambda = G$  (Eq. 6). Since Ground-Gen AWESs have larger glide ratios, they  
 also have larger values of  $\lambda_0$  compared to Fly-Gen. Larger  $\lambda_0$  means lower  $h_0$ , according to Eq. (4), and thus higher induced  
 velocities due to the far wake. This is due to the reel-out velocity of Ground-Gen AWES, which make them to fly closer to their  
 own wake.

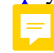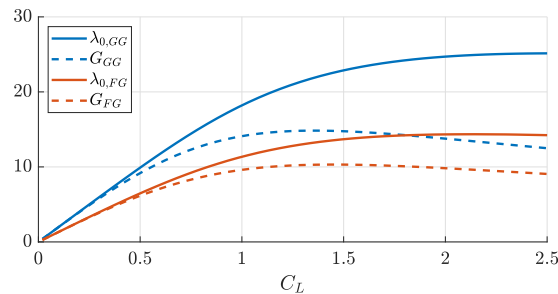

**Figure 6.** Normalized torsional parameter for a Ground-Gen and a Fly-Gen AWES (solid blue and red line respectively) and glide ratio (dashed blue and red line respectively) as function of the lift coefficient. Case with  $\mathcal{R} = 20$ ,  $\kappa_0 = 0.15$ ,  $C_{D0} = 0.05$  and  $\xi_t = 0.15$ .

215 Figure 7 shows the optimal power coefficients for Ground-Gen and Fly-Gen AWESs as function of the lift coefficient  
 for three different aspect ratios. Fly-Gen can extract more aerodynamic power compared to the same geometry Ground-Gen  
 AWESs, due to the far wake pitch. This is in accordance with the findings from Kheiri et al. (2019). Indeed, as discussed when  
 analyzing Fig. 6, Ground-Gen AWESs fly closer to their own wake due to reel-out velocity. Higher power coefficients can be  
 obtained with higher aspect ratios at high lift coefficients. In this comparison, if the aspect ratio is doubled (e.g. from 10 to 20),  
 220 the wing area is halved, as  $\kappa_0$  (and thus  $b$ ) is kept constant. To find which aspect ratio maximizes the power coefficient, one could  
 set the partial derivative of  $C_P$  with respect to the aspect ratio to zero. To get to an analytical solution, the wake is considered

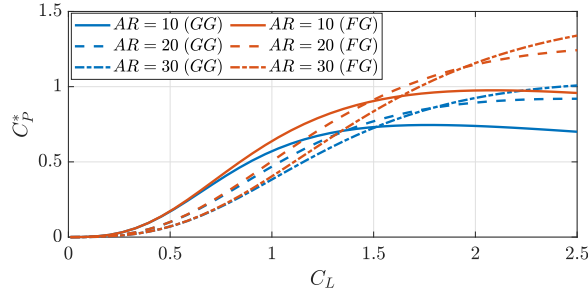

**Figure 7.** Power coefficients of Ground-Gen (blue lines) and Fly-Gen (red lines) AWESs as function of the lift coefficient. Case with  $\kappa_0 = 0.15$ ,  $C_{D0} = 0.05$ ,  $\xi_t = 0.15$  and three different  $\mathcal{AR}$  values.

straight ( $\kappa_0 = 0$ ) and the thrust power coefficient with  $\gamma_t = 1/2$  is considered for Fly-Gen (Eq. 25). Under these assumptions, the power coefficient of Ground-Gen and Fly-Gen AWESs coincide  $C_{Pt,FG}(\gamma_t = 1/2, \kappa_0 = 0) = C_{P,GG}(\gamma_o = 1/3, \kappa_0 = 0)$  (Eqs. 17 and 25). The partial derivative of  $C_P$  with respect to the aspect ratio is

$$225 \quad \frac{\partial C_P}{\partial \mathcal{AR}} = \frac{4}{27} \frac{C_L^3}{\pi} \left( \frac{\partial(1/\mathcal{AR})}{\partial \mathcal{AR}} \frac{1}{C_D^2} + \frac{1}{\mathcal{AR}} \frac{\partial(1/C_D^2)}{\partial \mathcal{AR}} \right) = 0, \quad (30)$$

where

$$\frac{\partial C_D}{\partial \mathcal{AR}} = -\frac{1}{\mathcal{AR}} C_{Di}. \quad (31)$$

After a few steps, the condition which maximizes  $C_P$  is found when the induced drag coefficient equals the drag coefficient at zero lift,  $C_{Di} = C_{D0}$ , which results in

$$230 \quad \mathcal{AR}^\otimes = \frac{C_L}{\pi} G_0, \quad (32)$$

with  $G_0 = \frac{C_L}{C_{D0}}$  and the symbol  $\otimes$  indicates an optimal quantity, obtained with analytical models. This aspect ratio answers to the question: "Given a wing span, which is the aspect ratio that maximizes power?". Note that this derivation would not have been possible if the power coefficient was defined as the power harvesting factor  $PHF$  (taking as reference area  $A_{ref}$  in Eqs. (14) and (24) the wing area  $A$ ). Indeed, by taking  $\frac{\partial PHF}{\partial \mathcal{AR}} = 0$ , one looks for the aspect ratio which answers to the question: "Given a wing area, which is the aspect ratio that maximize power?". The solution, in this case, is an infinite aspect ratio. This highlights one of the benefits of using a reference area for the power coefficient proportional to the wing span and not to the wing area.

The aspect ratios which maximize the  $C_P$  for Ground-Gen and Fly-Gen AWESs, considering the wake structure and the onboard wind turbines induction, can be found by solving two optimization problems.

240 For Ground-Gen AWESs, the optimal values of  $\gamma_o$  and  $\mathcal{AR}$  can be found by solving the optimization problem

$$(\gamma_o, \mathcal{AR}, \lambda_0)^* = \arg \left( \max_{(\gamma_o, \mathcal{AR}, \lambda_0)} C_{P,GG}(\gamma_o, \lambda_0, C_L, C_{D0}, \mathcal{AR}, \kappa_0) \right) \quad (33)$$

subject to:  $h(\lambda_0, C_L, C_{D0}, \mathcal{AR}, \kappa_0) = 0$ ,

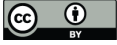

where  $h$  is defined in Eq. (10) and it does not depend on  $\gamma_o$ . Its optimal value is always  $\gamma_o^* = 1/3$  (Eq. 17).

For Fly-Gen AWESs, the optimal values of  $\gamma_t$  and  $\mathcal{R}$  can be found by solving the optimization problem

$$(\gamma_t, \mathcal{R}, \lambda_0)^* = \arg \left( \max_{(\gamma_t, \mathcal{R}, \lambda_0)} C_{P,FG}(\gamma_t, \lambda_0, C_L, C_{D0}, \mathcal{R}, \kappa_0, \xi_t) \right) \quad (34)$$

subject to:  $h(\gamma_t, \lambda_0, C_L, C_{D0}, \mathcal{R}, \kappa_0) = 0$ .

245 In Fig. 8, the analytical solution (Eq. 32) is compared with the optimization problems results. For  $\kappa_0 = 0$ , the optimal  $\mathcal{R}$  for Ground-Gen is equal to the analytical expression, while for Fly-Gen is slightly different because Eq. (32) is derived by considering thrust power and not shaft power. By increasing  $\kappa_0$ , the optimal aspect ratio increases of a relatively small value compared to the analytical solution. Equation (32) can then be used in design and optimization studies as an educated initial guess for the wing aspect ratio, when the design wing lift coefficient and the drag coefficient at zero lift are known.

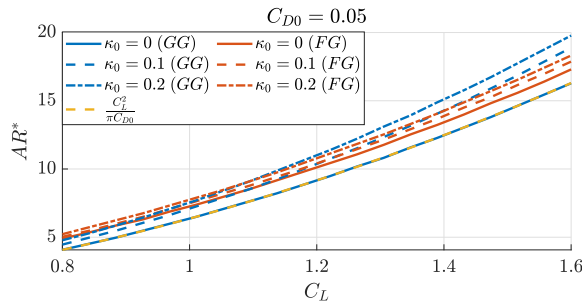

**Figure 8.** Optimal aspect ratio found analytically  $\mathcal{R}^\otimes$  and numerically  $\mathcal{R}^*$  for Ground-Gen (blue lines) and Fly-Gen (red lines) for different  $\kappa_0$  as function of  $C_L$ . Case with  $C_{D0} = 0.05$  and  $\xi_t = 0.15$ .

250 By using the analytical expression for the optimal  $\mathcal{R}$  (Eq. 32), obtained with  $C_{Di} = C_{D0}$ , into Eqs. (17) and (25) (the thrust power coefficient for Fly-Gen is considered), the maximum power coefficient  $C_P^\otimes$  with straight wake ( $\kappa_0 = 0$ ) is

$$C_P^\otimes = \frac{G_0}{27}. \quad (35)$$

This power coefficient physically represents the upper bound of the power production of an AWES flying in a circular path with infinite radius, for given lift coefficient and drag coefficient at zero lift.

255 With a similar procedure, a corresponding thrust coefficient is found by inserting the analytical expression for  $\mathcal{R}^\otimes$  into Eq. (15) with  $\gamma_o = 1/3$  and Eq. (27) with  $\gamma_t = 1/2$  and considering  $\kappa_0 = 0$

$$C_T^\otimes = \frac{G_0}{9}. \quad (36)$$

Figure 9 shows the optimal power coefficients, found by solving the optimization problems (33) and (34), as function of  $C_L$  for different  $\kappa_0$ . The maximum power coefficient, considering straight wakes, of Fly-Gen AWESs is slightly lower than the analytical maximum power coefficient  $C_P^\otimes$  (Eq. 35) and than  $C_{P,GG}^*(\kappa_0 = 0)$  because of the power losses due to onboard wind turbine induction. For increasing  $\kappa_0$ , the maximum power coefficient decreases. As noted when analyzing Fig. 7, Fly-Gen have

260

**Table 1.** Reference values for the Ground-Gen AWESs examples (Trevisi et al. (2022b) Eijkelhof and Schmehl (2022)).

|         |            |         |             |                      |           |         |               |      |          |       |
|---------|------------|---------|-------------|----------------------|-----------|---------|---------------|------|----------|-------|
| Zefiro  | $m$        | 530 kg  | $A$         | 14.25 m <sup>2</sup> | $b$       | 15.18 m | $\mathcal{R}$ | 16.2 | $D_t$    | 0.01  |
|         | $L_{t,in}$ | 100 m   | $L_{t,fin}$ | 700 m                | $C_{D,v}$ | 0.0176  | $C_{D\perp}$  | 0.8  | $C_{D0}$ | 0.074 |
| MegAWES | $m$        | 6885 kg | $A$         | 150 m <sup>2</sup>   | $b$       | 42.5 m  | $\mathcal{R}$ | 12.1 | $D_t$    | 0.03  |
|         | $L_{t,in}$ | 750 m   | $L_{t,fin}$ | 1500 m               | $C_{D,v}$ | 0.02    | $C_{D\perp}$  | 1.2  | $C_{D0}$ | 0.067 |

a higher power generation potential compared to Ground-Gen AWESs. The power coefficients of Ground-Gen (Eq. 14, blue lines) and Fly-Gen (Eq. 26, red lines) are defined taking the disc with radius equal to the AWES wing span as reference area. Considering this reference area, the AWES power coefficient can take values higher than the Betz limit and the unity without violating any physical law. Note that the power coefficient for Ground-Gen AWESs neglects the reel-in phase and the losses due to the potential energy exchange, while the power coefficient for Fly-Gen AWESs neglects the losses due to the potential energy exchange.

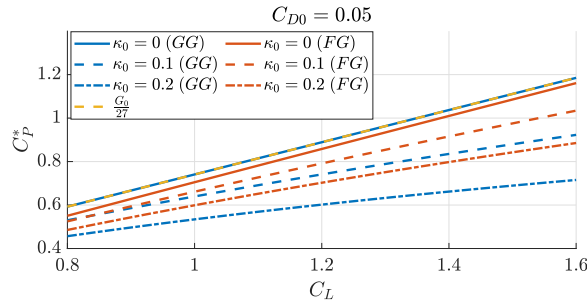

**Figure 9.** Aerodynamic power coefficients, as function of the lift coefficient, of Ground-Gen (blue lines) and Fly-Gen (red lines) AWESs and maximum aerodynamic power coefficient (yellow dashed line). Case with  $C_{D0} = 0.05$ ,  $\xi_t = 0.15$ , the optimal aspect ratios  $\mathcal{R}^*$  and the optimal coefficients  $\gamma_o = 1/3$  and  $\gamma_t^*$ .

## 6 Numerical examples

In this section, three AWESs from literature are analyzed based on the mathematical models introduced in this paper.

In Table 1, the parameters describing two Ground-Gen AWESs are given. Zefiro is an ultralight glider, its flight mechanics, when used as a Ground-Gen AWES, is studied by Trevisi et al. (2021) and its design by Trevisi et al. (2022b). MegAWES refers to the AWES introduced by Eijkelhof and Schmehl (2022). As Zefiro and MegAWES operate at different tether length during the reel-out phase, they are studied at the initial and the final tether length.



**Table 2.** Reference values for the examples (Values from the Makani MX2 description Tucker (2020)).

|     |             |                       |                |                    |                         |              |
|-----|-------------|-----------------------|----------------|--------------------|-------------------------|--------------|
| MX2 | $m$ 2000 kg | $A$ 54 m <sup>2</sup> | $b$ 26 m       | $\mathcal{R}$ 12.5 | $A_t$ 35 m <sup>2</sup> | $\xi_t$ 0.18 |
|     | $L_t$ 300 m | $D_t$ 0.03            | $C_{D,v}$ 0.04 | $C_{D\perp}$ 0.7   | $C_{D0}$ 0.069          |              |

In Table 2, the parameters describing the Makani MX2 design (Tucker (2020)), which is the Fly-Gen AWES chosen for the example, are given. A detailed analysis of the power losses due to potential energy exchange of the MX2 is carried out by Trevisi et al. (2022a).

To start the analysis, the optimal onboard wind turbine thrust factor  $\gamma_t^*$  (blue - left axis) and the relative efficiency due to the onboard wind turbine induction (red - right axis) for the MX2 are shown in Fig. 10. The MX2 is designed to operate at a lift coefficient  $C_L = 1.8$ , leading to an efficiency of  $1 - a_t \approx 96.5\%$  in steady state. Even if the power losses due to the onboard wind turbine induction seem small in steady state, they are responsible for modifying the optimal trajectories at low wind speed and reducing the power production, as shown by Trevisi et al. (2022a).

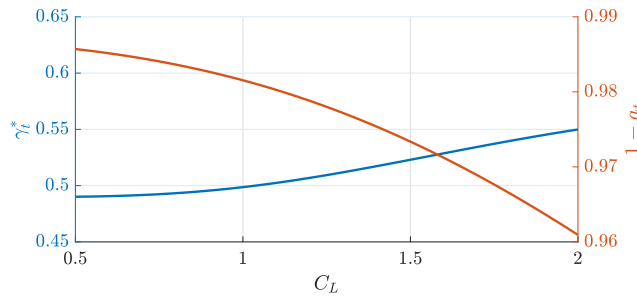

**Figure 10.** Optimal value of  $\gamma_t$  (blue - left axis) and efficiency due to onboard wind turbine induction (red - right axis) as function of the lift coefficient for the MX2 design (Table 2).

In Fig. 11, the inverse turning ratios are shown as function of the lift coefficient. The optimal opening angle  $\Phi$ , computed with Eq. (12), is used to find the turning radius  $R_0$  and thus  $\kappa_0 = \frac{b/2}{R_0}$ . The inverse turning ratio is larger for Ground-Gen AWESs at the initial tether length. Note that the vortex model assumes a fully developed wake and this assumption does not hold when analyzing the first few loops of the reel-out phase.

In Fig. 12, the glide ratio is shown. As noted when comparing Ground-Gen and Fly-Gen AWESs in Sect. 5, the Fly-Gen MX2 has lower glide ratio as the onboard wind turbine thrust is included in the drag estimation. The tether length is largely influencing the glide ratio. At low tether length, the glide ratio is higher because the tether drag contributes with a small share to the drag coefficient at zero lift  $C_{D0}$ .

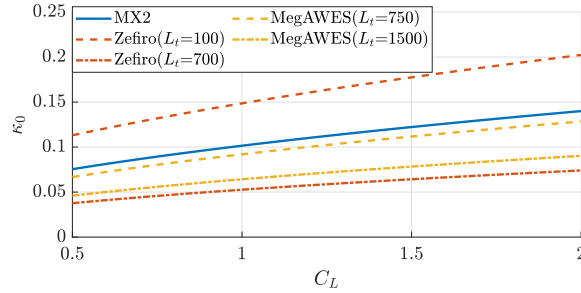

**Figure 11.** Inverse turning ratios as function of the lift coefficient for the examples (Tables 1 and 2). Ground-Gen AWESs  $\kappa_0$  is shown at initial and final tether length.

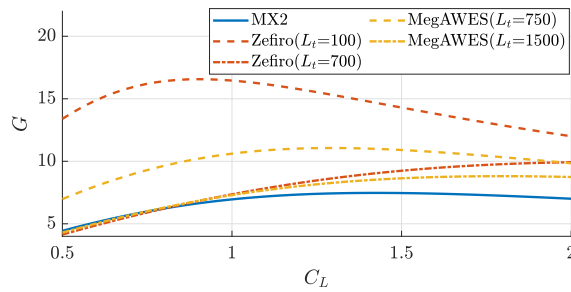

**Figure 12.** Glide ratios as function of the lift coefficient for the examples (Tables 1 and 2). Ground-Gen AWESs  $G$  is shown at initial and final tether length.

290 In Fig. 13, the ratio of induced drag due to the far wake to the total induced drag is shown. For Ground-Gen AWESs, the far wake contribution is high at low tether length and decreases during the reel-out, as the inverse turning ratio (Fig. 11) and the glide ratio (Fig. 12) decrease.

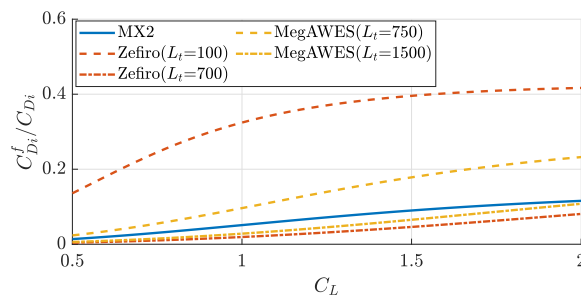

**Figure 13.** Ratio between the induced drag due to the far wake and the total induced drag as function of the lift coefficient for the examples (Tables 1 and 2). Ground-Gen AWESs values are shown at initial and final tether length.

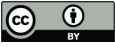

Finally, the optimal power coefficients are shown in Fig. 14. Ground-Gen AWESs at low tether lengths can achieve higher optimal  $C_P$ . Note that Zefiro, at the initial tether length, maximizes power with a lift coefficient of approximately  $C_L = 1.4$ . This indicates that, from aerodynamic considerations, different lift coefficients could be optimal at different tether length.

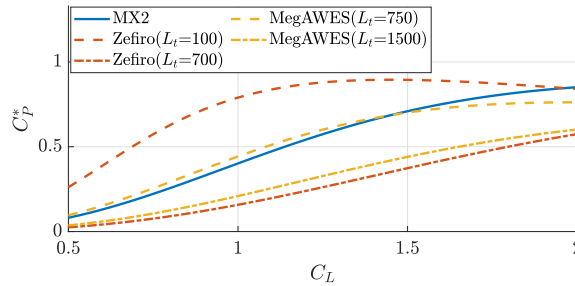

**Figure 14.** Optimal power coefficients as function of the lift coefficient for the examples (Tables 1 and 2). Ground-Gen AWESs  $C_P^*$  is shown at initial and final tether length.

## 7 Conclusions

In this work, the aerodynamic wake model developed by Trevisi et al. (2023) is used to refine the power equations of Ground-Gen and Fly-Gen AWESs. The aerodynamic model assumes steady crosswind circular trajectories and a non-expanding heli-  
 coidal vortex wake. The main assumptions and equations of the wake model are reported in Sect. 2. The power equations of  
 300 Ground-Gen and Fly-Gen AWESs are refined by accounting for the aerodynamic wake in the induced drag coefficient esti-  
 mation. In this way, the effects of changing geometrical and aerodynamic quantities on the overall power production can be  
 intuitively understood. For Ground-Gen AWESs, the optimal reel-out velocity is not influenced by the wake structure. For Fly-  
 Gen AWESs, the onboard wind turbines induction is modelled with 1D momentum theory, such that the power at the onboard  
 turbine shaft is found.

305 To compare different concepts, a novel power coefficient is defined by normalizing the aerodynamic power with the wind  
 power passing through a disc with radius equal to the AWES wing span. The aspect ratio which maximizes this power coef-  
 ficient (i.e. which maximizes the aerodynamic power for a given wing span) is found to be finite. The optimal aspect ratio,  
 considering an infinite turning radius, is  $\frac{1}{\pi} \frac{C_L^2}{C_{D0}}$ , where  $C_L$  is the design lift coefficient and  $C_{D0}$  the drag coefficient at zero lift.  
 For decreasing turning radii, the optimal aspect ratios slightly increase with respect to the analytical expression. Considering  
 310 an infinite turning radius and the optimal aspect ratio, the maximum power coefficient is  $\frac{1}{27} \frac{C_L}{C_{D0}}$ . For decreasing turning radii,  
 the maximum power coefficients decrease with respect to the analytical expression.

By comparing power coefficients, Ground-Gen AWESs are found to have lower power generation potential compared to  
 the same geometry Fly-Gen AWESs because they fly closer to their own wake, due to the reel-out velocity of the tether. To





conclude, three AWESs of different sizes from literature are studied. The two Ground-Gen AWESs are analyzed at the initial  
315 and final tether length of the reel-out phase, finding that higher power coefficients can be obtained at shorter tether length.

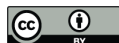

## Nomenclature

### Latin Symbols

|     |               |                                                                             |
|-----|---------------|-----------------------------------------------------------------------------|
|     | $A$           | Wing area                                                                   |
|     | $a_r$         | Radial induction                                                            |
| 320 | $a_z$         | Axial induction                                                             |
|     | $\mathcal{A}$ | Wing aspect ratio                                                           |
|     | $b$           | Wing span                                                                   |
|     | $C_D$         | System drag coefficient                                                     |
|     | $C_{D0}$      | System drag coefficient at zero lift                                        |
| 325 | $C_{Di}$      | Induced drag coefficient                                                    |
|     | $C_{Di}^f$    | Induced drag coefficient due to the far wake                                |
|     | $C_{Di}^n$    | Induced drag coefficient due to the near wake                               |
|     | $C_{D\perp}$  | Drag coefficient of the tether section                                      |
|     | $C_{D,v}$     | Viscous and pressure drag coefficient                                       |
| 330 | $C_L$         | Wing lift coefficient                                                       |
|     | $C_P$         | Power coefficient                                                           |
|     | $C_{Pt}$      | Thrust power coefficient (for Fly-Gen AWESs)                                |
|     | $C_T$         | Thrust coefficient                                                          |
|     | $C_{T,t}$     | On-board wind turbine thrust coefficient with respect to the AWES wing area |
| 335 | $D_t$         | Tether diameter                                                             |
|     | $G$           | $C_L/(C_D + C_{T,t})$ : glide ratio                                         |
|     | $G_0$         | $C_L/C_{D0}$ : glide ratio related to the drag coefficient at zero lift     |
|     | $h_0$         | Helicoidal wake pitch                                                       |
|     | $L_t$         | Tether length                                                               |
| 340 | $m$           | AWES mass plus one third of the tether mass                                 |
|     | $R_0$         | Turning radius                                                              |
|     | $u_0$         | AWES longitudinal velocity                                                  |
|     | $v_r$         | Relative wind speed                                                         |
|     | $v_w$         | Wind speed                                                                  |

### 345 Greek Symbols

|     |             |                                                              |
|-----|-------------|--------------------------------------------------------------|
|     | $\gamma_o$  | $v_o/v_w$ : reel-out factor                                  |
|     | $\gamma_t$  | $C_{T,t}/C_D$ : on-board wind turbine thrust factor          |
|     | $\kappa_0$  | $b/(2R_0)$ : inverse turning ratio                           |
|     | $\lambda$   | $u_0/v_r$ : wing speed ratio                                 |
| 350 | $\lambda_0$ | Normalized torsional parameter of the helicoidal wake        |
|     | $\Phi$      | Opening angle of the cone swept by the AWESs during one loop |
|     | $\rho$      | Air density                                                  |

### Symbols

|     |           |                                     |
|-----|-----------|-------------------------------------|
|     | $\otimes$ | Optimal quantity found analytically |
| 355 | *         | Optimal quantity                    |



*Author contributions.* FT conceptualized and developed the research methods, produced the results and wrote the draft version of the paper. AC and CEDR supervised the research, supported the methodology conceptualization and reviewed the paper.

*Competing interests.* Alessandro Croce is a member of the editorial board of Wind Energy Science. The authors have no other competing interests to declare.



## 360 References

- Argatov, I. and Silvennoinen, R.: Efficiency of Traction Power Conversion Based on Crosswind Motion, in: *Airborne Wind Energy*, edited by Ahrens, U., Diehl, M., and Schmehl, R., pp. 65–79, Springer Berlin Heidelberg, Berlin, Heidelberg, [https://doi.org/10.1007/978-3-642-39965-7\\_4](https://doi.org/10.1007/978-3-642-39965-7_4), 2013.
- Bauer, F., Kennel, R. M., Hackl, C. M., Campagnolo, F., Patt, M., and Schmehl, R.: Drag power kite with very high lift coefficient, *Renewable Energy*, 118, 290–305, <https://doi.org/10.1016/j.renene.2017.10.073>, 2018.
- 365 De Lellis, M., Reginatto, R., Saraiva, R., and Trofino, A.: The Betz limit applied to Airborne Wind Energy, *Renewable Energy*, 127, 32–40, <https://doi.org/10.1016/j.renene.2018.04.034>, 2018.
- Diehl, M.: Airborne Wind Energy: Basic Concepts and Physical Foundations, in: *Airborne Wind Energy*, edited by Ahrens, U., Diehl, M., and Schmehl, R., pp. 3–22, Springer Berlin Heidelberg, Berlin, Heidelberg, [https://doi.org/10.1007/978-3-642-39965-7\\_1](https://doi.org/10.1007/978-3-642-39965-7_1), 2013.
- 370 Eijkelhof, D. and Schmehl, R.: Six-degrees-of-freedom simulation model for future multi-megawatt airborne wind energy systems, *Renewable Energy*, 196, 137–150, <https://doi.org/10.1016/j.renene.2022.06.094>, 2022.
- Gaunaa, M., Forsting, A. M., and Trevisi, F.: An engineering model for the induction of crosswind kite power systems, *Journal of Physics: Conference Series*, 1618, 032 010, <https://doi.org/10.1088/1742-6596/1618/3/032010>, 2020.
- Kheiri, M., Bourgault, F., Saberi Nasrabad, V., and Victor, S.: On the aerodynamic performance of crosswind kite power systems, *Journal of Wind Engineering and Industrial Aerodynamics*, 181, 1–13, <https://doi.org/10.1016/j.jweia.2018.08.006>, 2018.
- 375 Kheiri, M., Saberi Nasrabad, V., and Bourgault, F.: A new perspective on the aerodynamic performance and power limit of crosswind kite systems, *Journal of Wind Engineering and Industrial Aerodynamics*, 190, 190–199, <https://doi.org/10.1016/j.jweia.2019.04.010>, 2019.
- Leuthold, R., Crawford, C., Gros, S., and Diehl, M.: Engineering Wake Induction Model For Axisymmetric Multi-Kite Systems, *Journal of Physics: Conference Series*, <https://doi.org/10.1088/1742-6596/1256/1/012009>, 2019.
- 380 Loyd, M.: Crosswind Kite Power, *Journal of Energy*, 4, 106–111, 1980.
- Luchsinger, R. H.: Pumping Cycle Kite Power, in: *Airborne Wind Energy*, edited by Ahrens, U., Diehl, M., and Schmehl, R., pp. 47–64, Springer Berlin Heidelberg, Berlin, Heidelberg, [https://doi.org/10.1007/978-3-642-39965-7\\_3](https://doi.org/10.1007/978-3-642-39965-7_3), 2013.
- Marten, D., Lennie, M., Pechlivanoglou, G., Nayeri, C. N., and Paschereit, C. O.: Implementation, Optimization and Validation of a Non-linear Lifting Line Free Vortex Wake Module Within the Wind Turbine Simulation Code QBlade, Volume 9: Oil and Gas Applications; Supercritical CO<sub>2</sub> Power Cycles; *Wind Energy*, <https://doi.org/10.1115/GT2015-43265>, 2015.
- 385 Schmehl, R., Noom, M., and van der Vlugt, R.: Traction Power Generation with Tethered Wings, in: *Airborne Wind Energy*, edited by Ahrens, U., Diehl, M., and Schmehl, R., pp. 23–45, Springer Berlin Heidelberg, Berlin, Heidelberg, [https://doi.org/10.1007/978-3-642-39965-7\\_2](https://doi.org/10.1007/978-3-642-39965-7_2), 2013.
- Trevisi, F., Gaunaa, M., and McWilliam, M.: The Influence of Tether Sag on Airborne Wind Energy Generation., *Journal of Physics: Conference Series*, 1618, <https://doi.org/10.1088/1742-6596/1618/3/032006>, 2020a.
- 390 Trevisi, F., Gaunaa, M., and McWilliam, M.: Unified engineering models for the performance and cost of Ground-Gen and Fly-Gen crosswind Airborne Wind Energy Systems, *Renewable Energy*, 162, 893–907, <https://doi.org/10.1016/j.renene.2020.07.129>, 2020b.
- Trevisi, F., Croce, A., and Riboldi, C. E. D.: Flight Stability of Rigid Wing Airborne Wind Energy Systems, *Energies*, 14, <https://doi.org/10.3390/en14227704>, 2021.



- 395 Trevisi, F., Castro-Fernández, I., Pasquinelli, G., Riboldi, C. E. D., and Croce, A.: Flight trajectory optimization of Fly-Gen airborne wind energy systems through a harmonic balance method, *Wind Energy Science*, 7, 2039–2058, <https://doi.org/10.5194/wes-7-2039-2022>, 2022a.
- Trevisi, F., Riboldi, C. E. D., and Croce, A.: Sensitivity analysis of a Ground-Gen Airborne Wind Energy System design., *Journal of Physics: Conference Series*, 2265, 042 067, <https://doi.org/10.1088/1742-6596/2265/4/042067>, 2022b.
- 400 Trevisi, F., Riboldi, C. E. D., and Croce, A.: Vortex model of the airborne wind energy systems aerodynamic wake, *Wind Energy Science Discussions*, 2023, 1–31, <https://doi.org/10.5194/wes-2023-25>, 2023.
- Tucker, N.: Airborne Wind Turbine Performance: Key Lessons From More Than a Decade of Flying Kites., in: *The Energy Kite Part I*, edited by Echeverri, P., Fricke, T., Homsy, G., and Tucker, N., pp. 93–224, <https://x.company/projects/makani/#>, 2020.
- Vander Lind, D.: Analysis and Flight Test Validation of High Performance Airborne Wind Turbines, in: *Airborne Wind Energy*, edited by Ahrens, U., Diehl, M., and Schmehl, R., pp. 473–490, Springer Berlin Heidelberg, Berlin, Heidelberg, [https://doi.org/10.1007/978-3-642-39965-7\\_28](https://doi.org/10.1007/978-3-642-39965-7_28), 2013.
- Vermillion, C., Cobb, M., Fagiano, L., Leuthold, R., Diehl, M., Smith, R. S., Wood, T. A., Rapp, S., Schmehl, R., Olinger, D., and Demetriou, M.: Electricity in the air: Insights from two decades of advanced control research and experimental flight testing of airborne wind energy systems, *Annual Reviews in Control*, 52, 330–357, <https://doi.org/10.1016/j.arcontrol.2021.03.002>, 2021.
